# Supplementary material for: Relative Roles of CD90 and c‐Kit to the Regenerative Efficacy of Cardiosphere‐Derived Cells in Humans and in a Mouse Model of Myocardial Infarction
Source: PubMed Central journal article supplement — J Am Heart Assoc. 2014 Oct 9;3(5):e001260. doi: 10.1161/JAHA.114.001260 (PMC4323830; doi:10.1161/jaha.114.001260), 2014-10-09
Supplement: jah3-3-e001260-s1.pdf [file jah3-3-e001260-s1.pdf]

## **Supplemental Materials**

## Supplemental Tables and Legend

| Antibody name                           | Vendor        | Catalog number | Dilution | Application |
|-----------------------------------------|---------------|----------------|----------|-------------|
| mouse anti- $\alpha$ -sarcomeric actin  | Sigma-Aldrich | A7611          | 1:400    | ICC/IHC     |
| rabbit anti- $\alpha$ -sarcomeric actin | Abcam         | ab52219        | 1:400    | ICC/IHC     |
| rabbit anti-Ki67                        | Abcam         | ab46154        | 1:400    | ICC/IHC     |
| chicken anti-CD105                      | Sigma-Aldrich | GW22756        | 1:400    | ICC/IHC     |
| mouse anti-human nuclear antigen        | Millipore     | Mab1281        | 1:400    | ICC/IHC     |
| rabbit anti-CD90                        | Abcam         | ab92574        | 1:400    | ICC/IHC     |
| rabbit anti-vimentin                    | Abcam         | ab92547        | 1:400    | ICC/IHC     |
| rat anti-procollagen                    | Abcam         | ab64409        | 1:400    | ICC/IHC     |
| mouse anti-CD117 (APC)                  | BD            | 550412         | 1:10     | Flow        |
| mouse anti-CD105 (PE)                   | R & D Systems | FAB10971P      | 1:5      | Flow        |
| mouse anti-CD90 (FITC)                  | BD            | 555595         | 1:5      | Flow        |
| mouse anti-CD45 (FITC)                  | BD            | 555482         | 1:5      | Flow        |

**Table S1. Detailed antibody information.**

| Patient ID | CD90+% | Change in Scar Size (% of LV) |
|------------|--------|-------------------------------|
| 1          | 4.12   | -11.64                        |
| 2          | 3.09   | -18.02                        |
| 3          | 3.33   | -14.01                        |
| 4          | 44.82  | -9.75                         |
| 5          | 28.26  | -6.97                         |
| 6          | 30.02  | -10.67                        |
| 7          | 94.60  | -1.82                         |
| 8          | 7.72   | -14.28                        |
| 9          | 38.05  | -6.59                         |
| 10         | 0.15   | -16.74                        |

**Table S2. Change in scar size at 12 months for each patient that had CD90 expression data from the CDCs.**

| <b>LVEFs immediately post-MI</b> |       |                          |                         |                           |
|----------------------------------|-------|--------------------------|-------------------------|---------------------------|
| Control                          | CDC   | c-kit <sup>DEP</sup> CDC | CD90 <sup>DEP</sup> CDC | Double <sup>DEP</sup> CDC |
| 30.37                            | 21.94 | 32.89                    | 36.73                   | 28.93                     |
| 35.35                            | 29.44 | 28.42                    | 34.01                   | 32.87                     |
| 29.89                            | 26.94 | 31.58                    | 34.07                   | 29.06                     |
| 26.35                            | 26.14 | 33.81                    | 27.87                   | 37.03                     |
| 29.13                            | 33.51 | 28.34                    | 32.29                   | 26.55                     |
| 33.13                            | 23.69 | 36.21                    | 19.96                   | 30.05                     |
|                                  | 26.26 | 32.42                    | 23.25                   | 29.04                     |
|                                  | 38.79 | 27.81                    | 17.97                   | 28.31                     |
|                                  | 32.98 | 28.92                    | 26.24                   | 32.65                     |
|                                  | 26.82 | 30.67                    | 30.64                   | 31.98                     |
|                                  | 33.97 | 33.42                    | 27.43                   | 17.56                     |
|                                  | 25.11 | 24.98                    | 25.20                   | 19.11                     |
|                                  | 30.43 | 30.56                    | 27.01                   |                           |
|                                  | 29.11 | 31.11                    | 37.71                   |                           |
|                                  |       |                          | 20.21                   |                           |
| <b>LVEFs at 3 weeks</b>          |       |                          |                         |                           |
| Control                          | CDC   | c-kit <sup>DEP</sup> CDC | CD90 <sup>DEP</sup> CDC | Double <sup>DEP</sup> CDC |
| 18.56                            | 36.21 | 43.57                    | 41.42                   | 42.35                     |
| 21.71                            | 27.50 | 31.21                    | 40.79                   | 43.28                     |
| 21.20                            | 30.84 | 29.47                    | 40.18                   | 37.56                     |
| 27.58                            | 34.25 | 41.78                    | 35.41                   | 35.98                     |
| 28.67                            | 37.31 | 30.62                    | 37.66                   | 40.22                     |
| 19.80                            | 29.91 | 47.28                    | 34.73                   | 39.15                     |
|                                  | 29.99 | 35.95                    | 46.88                   | 42.35                     |
|                                  | 29.17 | 33.10                    | 41.12                   | 43.28                     |
|                                  | 30.70 | 27.65                    | 37.84                   | 37.56                     |
|                                  | 32.54 | 29.33                    | 39.94                   | 35.98                     |
|                                  | 36.83 | 35.11                    | 33.30                   | 40.22                     |
|                                  | 34.26 | 30.12                    | 37.42                   | 39.15                     |
|                                  | 37.10 | 29.32                    | 42.09                   |                           |
|                                  | 31.20 | 35.08                    | 42.27                   |                           |
|                                  |       |                          | 41.42                   |                           |

**Table S3. Individual measurements of LVEFs.**

## Supplemental Figures and Legend

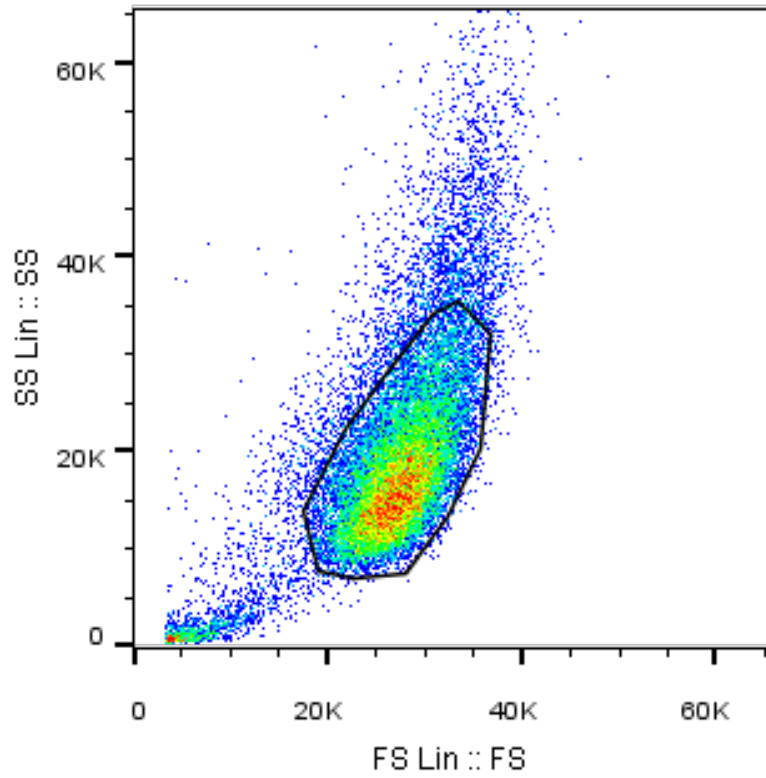

**Figure S1. Gating strategy for flow cytometry analysis.**

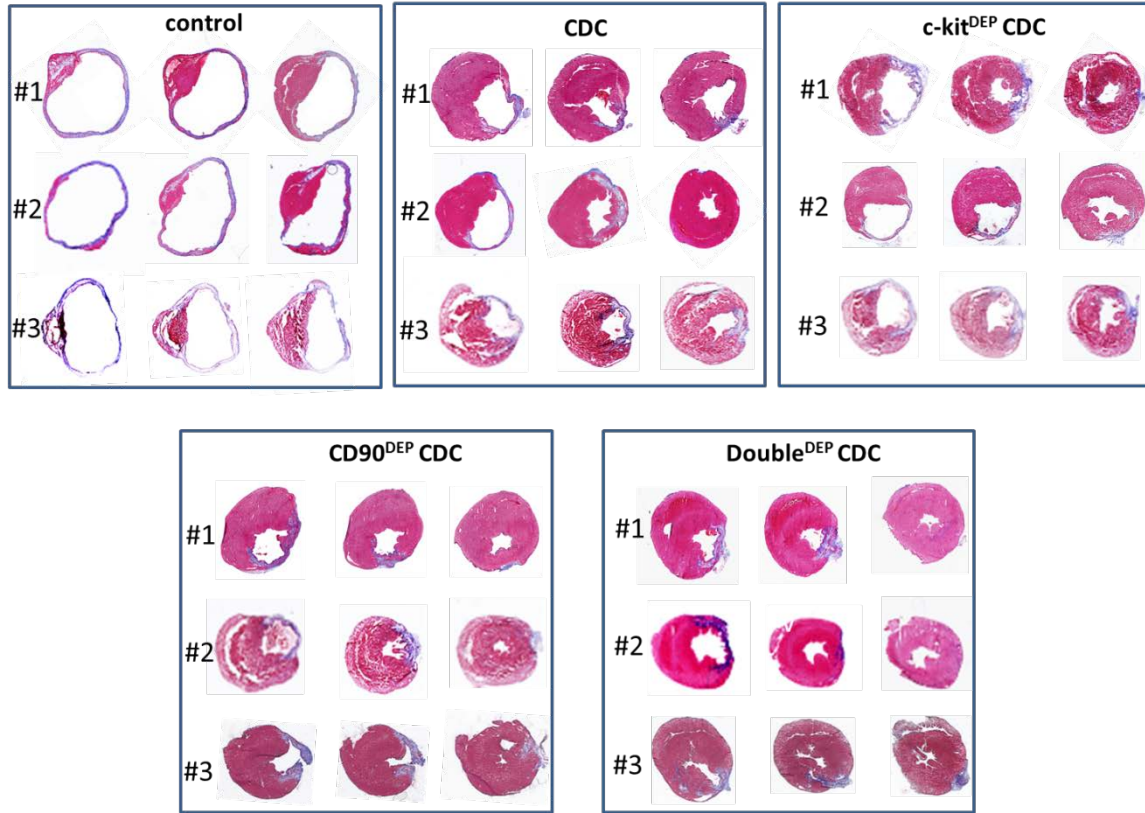

**Figure S2. Masson's Trichrome staining of heart sections (3 per animal) from three representative animals in each group.**

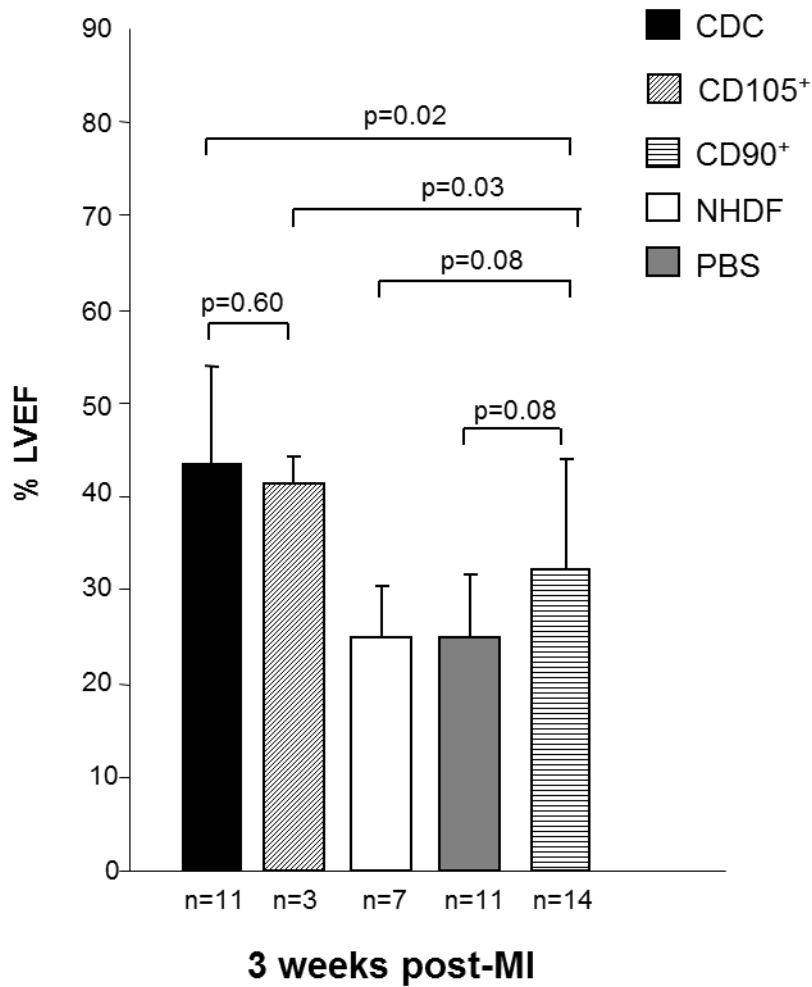

**Figure S3. Unsorted CDCs are more potent than CD90<sup>+</sup> subpopulations in augmenting cardiac function.** In a separate set of studies (partially reported earlier by Li et al., 2012), CD90<sup>+</sup> CDCs were selected using magnetic-activated cell sorting. Acute MIs were created in SCID mice and various groups of CDCs, dermal fibroblasts (NHDFs), or PBS were injected into the border zone. Echocardiograms were performed 3 weeks post-MI to measure left ventricular ejection fraction (LVEF). CD105<sup>+</sup>-sorted CDCs-injected mice were comparable to an historical control group of unsorted CDC-injected mice, indicating that the sorting process did not itself impair the therapeutic

potential of CDCs. CD90<sup>+</sup>-injected mice were significantly outperformed by the CD105<sup>+</sup>-injected or unsorted CDC-injected mice. Error bars = standard deviations.

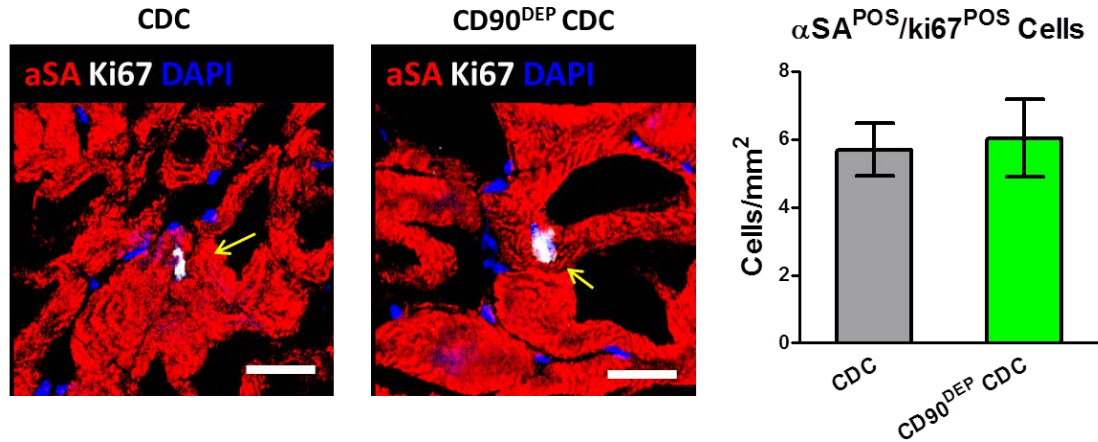

**Figure S4. CD90 depletion dose not enhance CDCs' ability to promote cardiomyocyte cycling in vivo.** Heart sections obtained 3 weeks after treatment were stained for Ki67 (white) as the proliferation marker. Bars = 50 μm. Error bars = standard deviations.

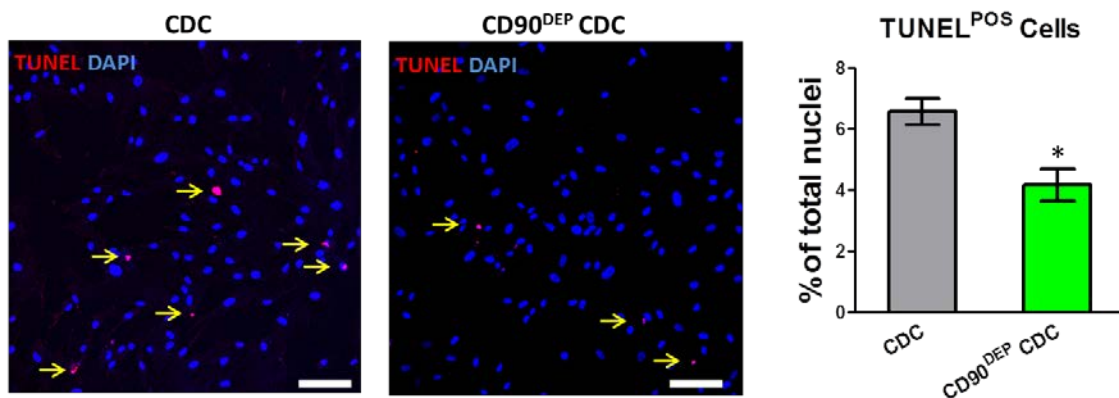

**Figure S5. CD90-depleted CDCs are more resistant to oxidative stress than control CDCs.** CD90-depleted CDCs and CDCs were cultured in media containing 50 μM H<sub>2</sub>O<sub>2</sub>

for 24 hrs. Apoptotic cells were detected by TUNEL staining (pink nuclei with yellow arrows). Bars = 50  $\mu$ m. \* indicates  $p < 0.05$ . Error bars = standard deviations.

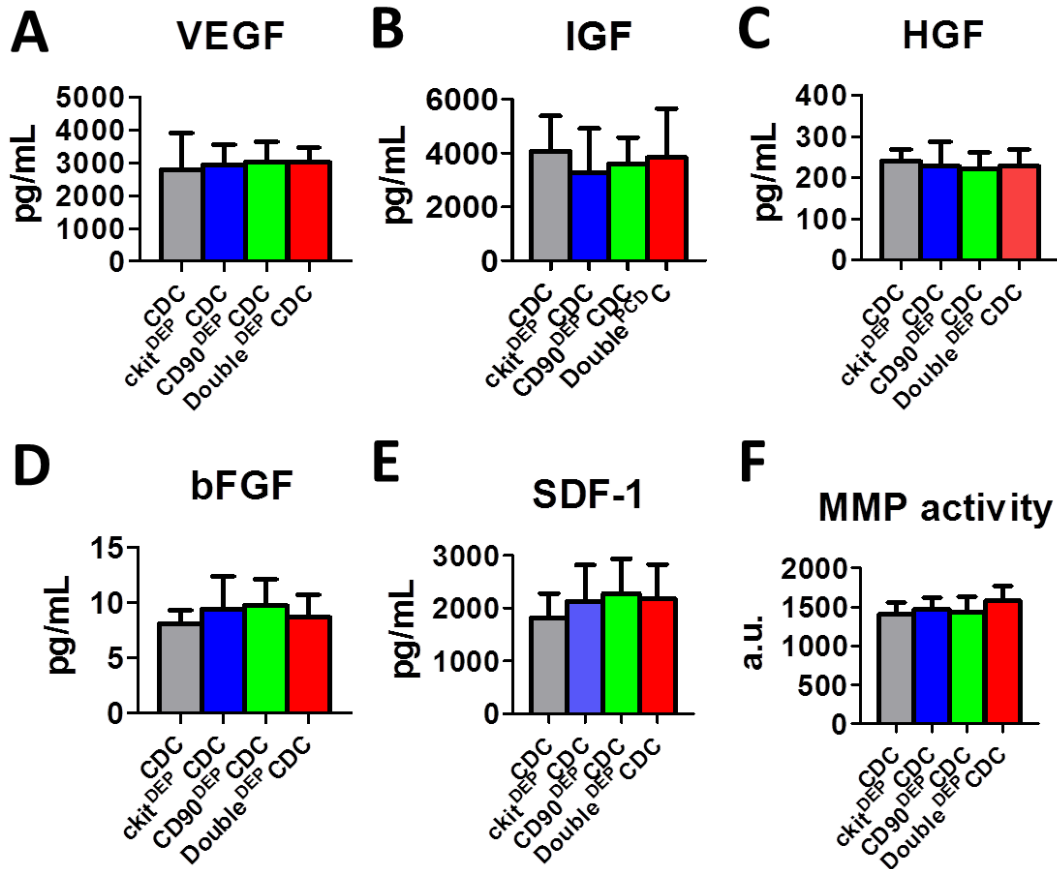

**Figure S6. Paracrine factors and proteinolytic activities of CDCs.** A-E, Secretion of various growth factors from CDCs. Concentrations were measured by ELISA. F, Proteinolytic activities (MMP2/MMP9) in CDC-conditioned media. All experiments were run in triplicate from three different CDC samples. Error bars = standard deviations.



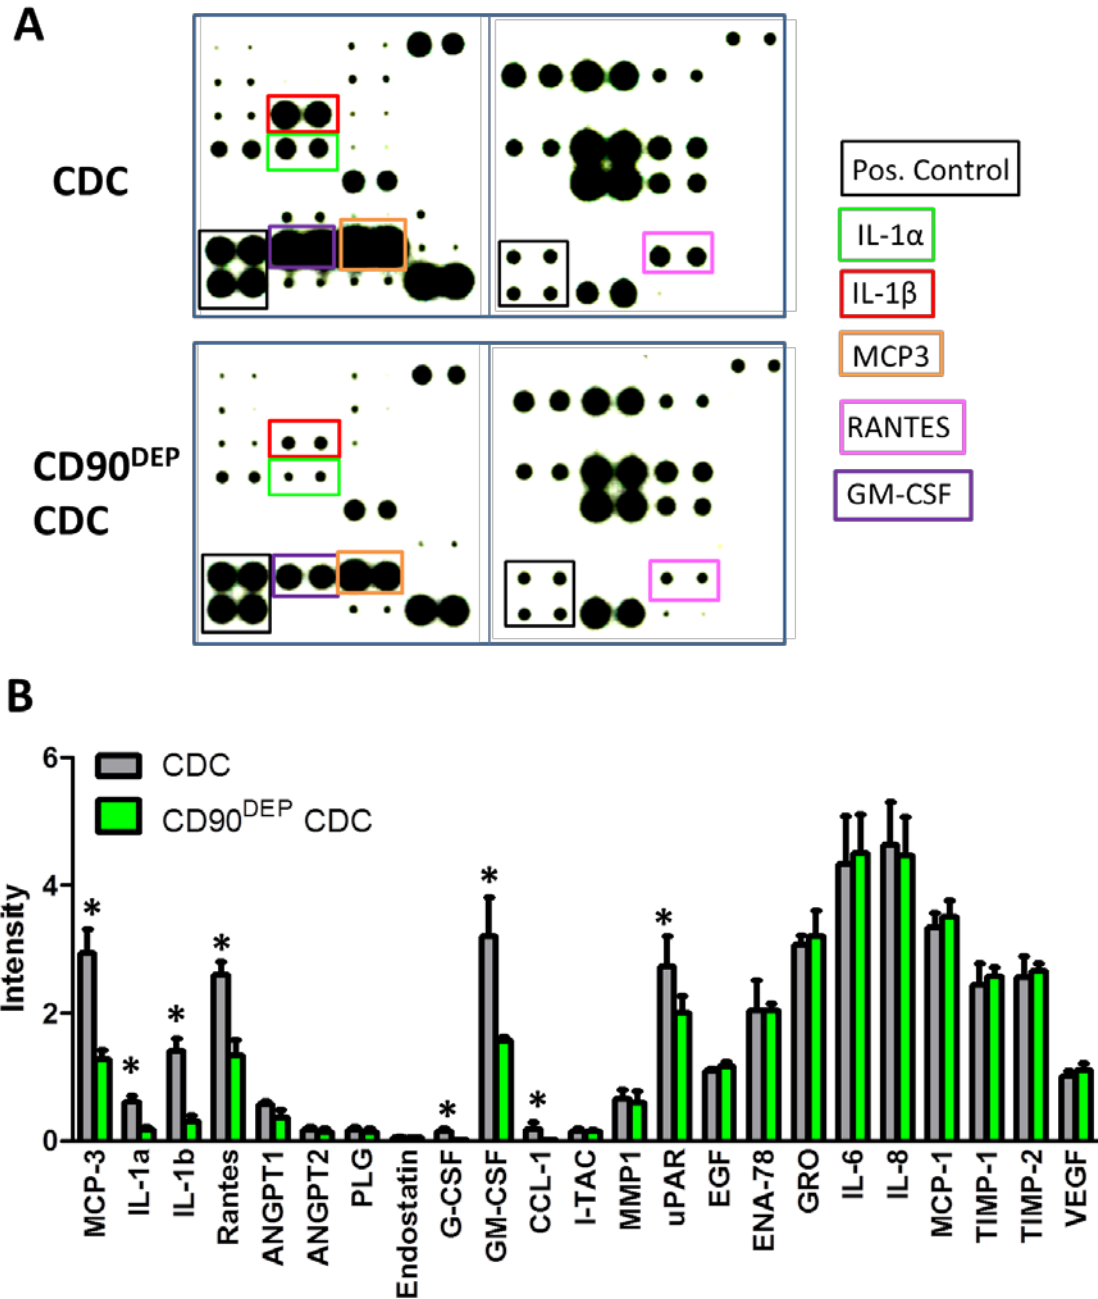

**Figure S7. Inflammatory cytokines secreted by CDCs.** A, Representative images of cytokine arrays measuring inflammatory cytokines in CDC-conditioned media. Each dot represents a specific cytokine or the positive control protein. Positive control, IL-1 $\alpha$ , IL-1 $\beta$ , MCP3, and RANTES are highlighted. B, Semi-quantitative analysis showing relative levels of cytokines determined with densitometry on the cytokine array and

normalized to the positive control dots. \* indicates  $P < 0.05$  when compared to “CDC”.

Data was obtained from three different CDC lines. Error bars = standard deviations.
